# Supplementary material for: Development of High-Yielding Upland Cotton Genotypes with Reduced Regrowth after Defoliation Using a Combination of Molecular and Conventional Approaches
Source: MDPI journal article supplement (doi:10.3390/genes14112081), 2023-11-15
Supplement: s1 [file s1]

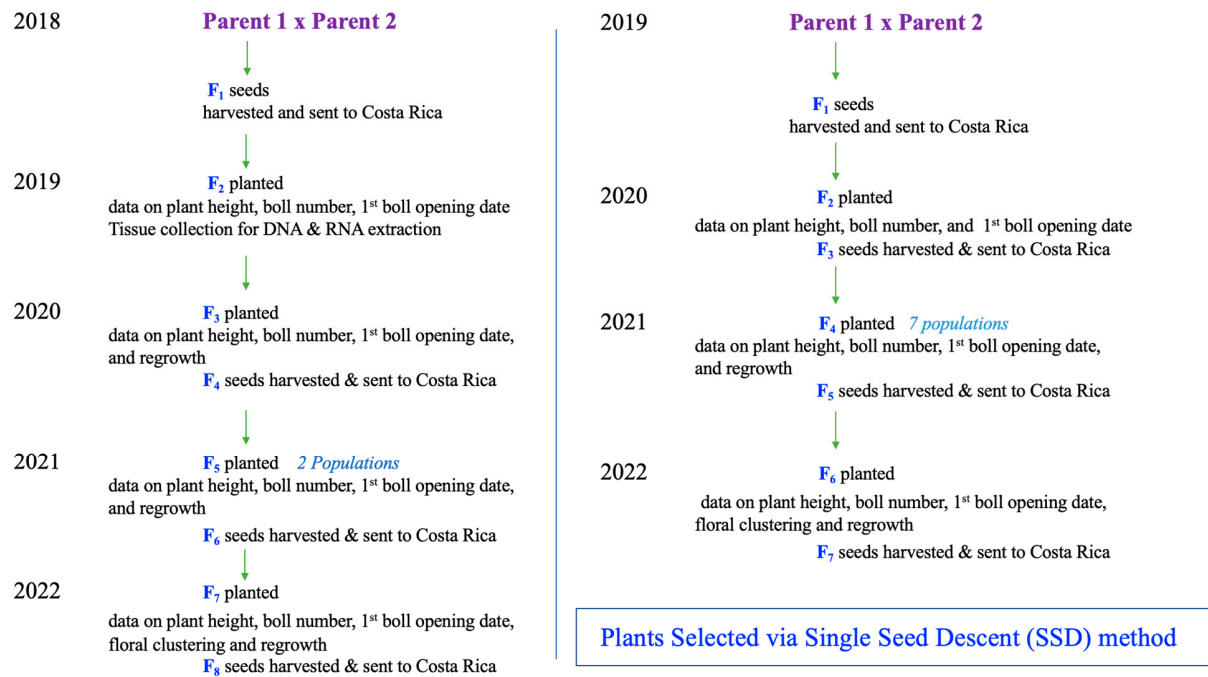

**Figure S1.** Timeline of the advancement of the breeding lines.

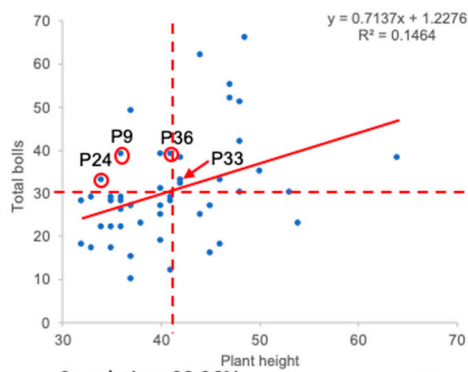

Correlation: 38.26%

**20 x 37**

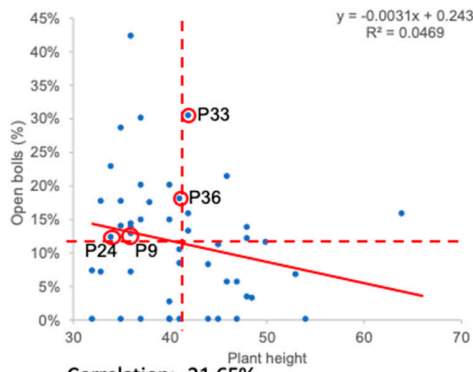

Correlation: -21.65%

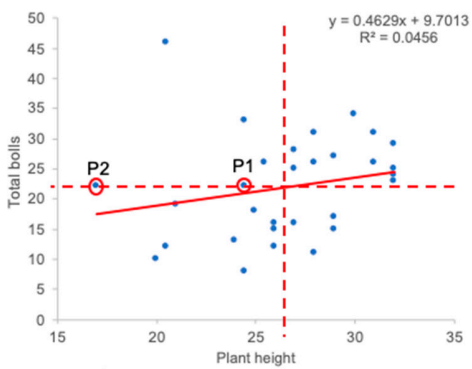

Correlation: 21.36%

**8 x 37**

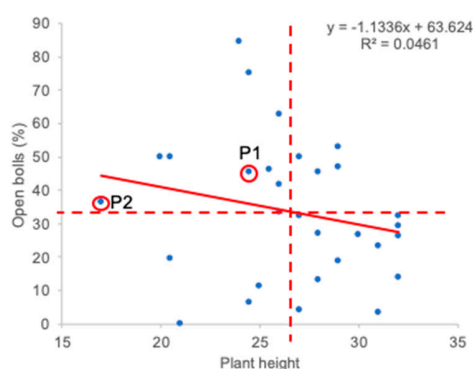

Correlation: -21.46%

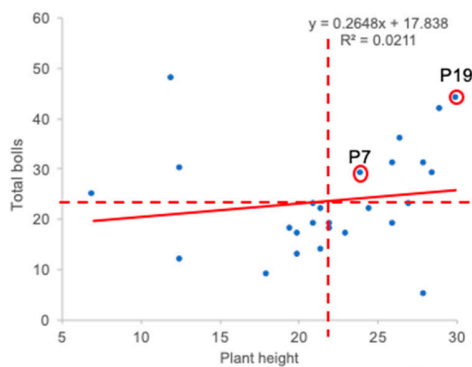

Correlation: 14.54%

**37 x 8**

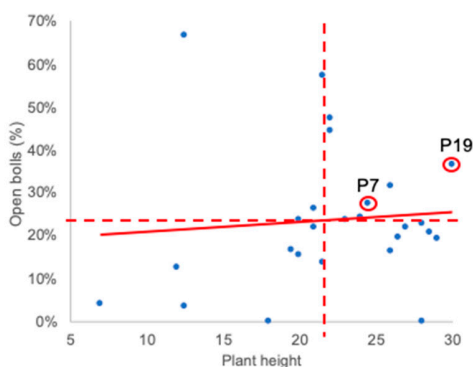

Correlation: 8.09%

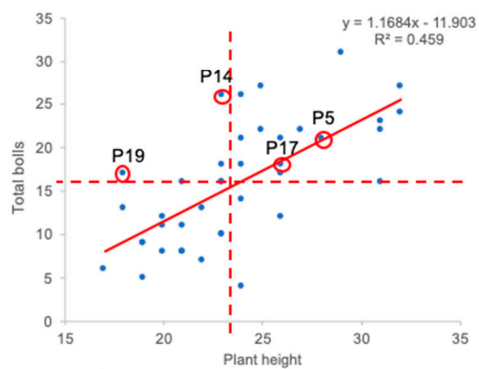

Correlation: 67.75%

**39 x 5**

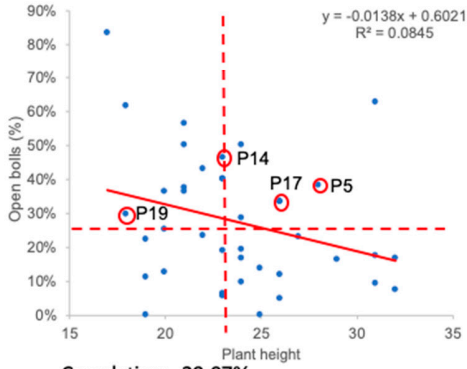

Correlation: -29.07%

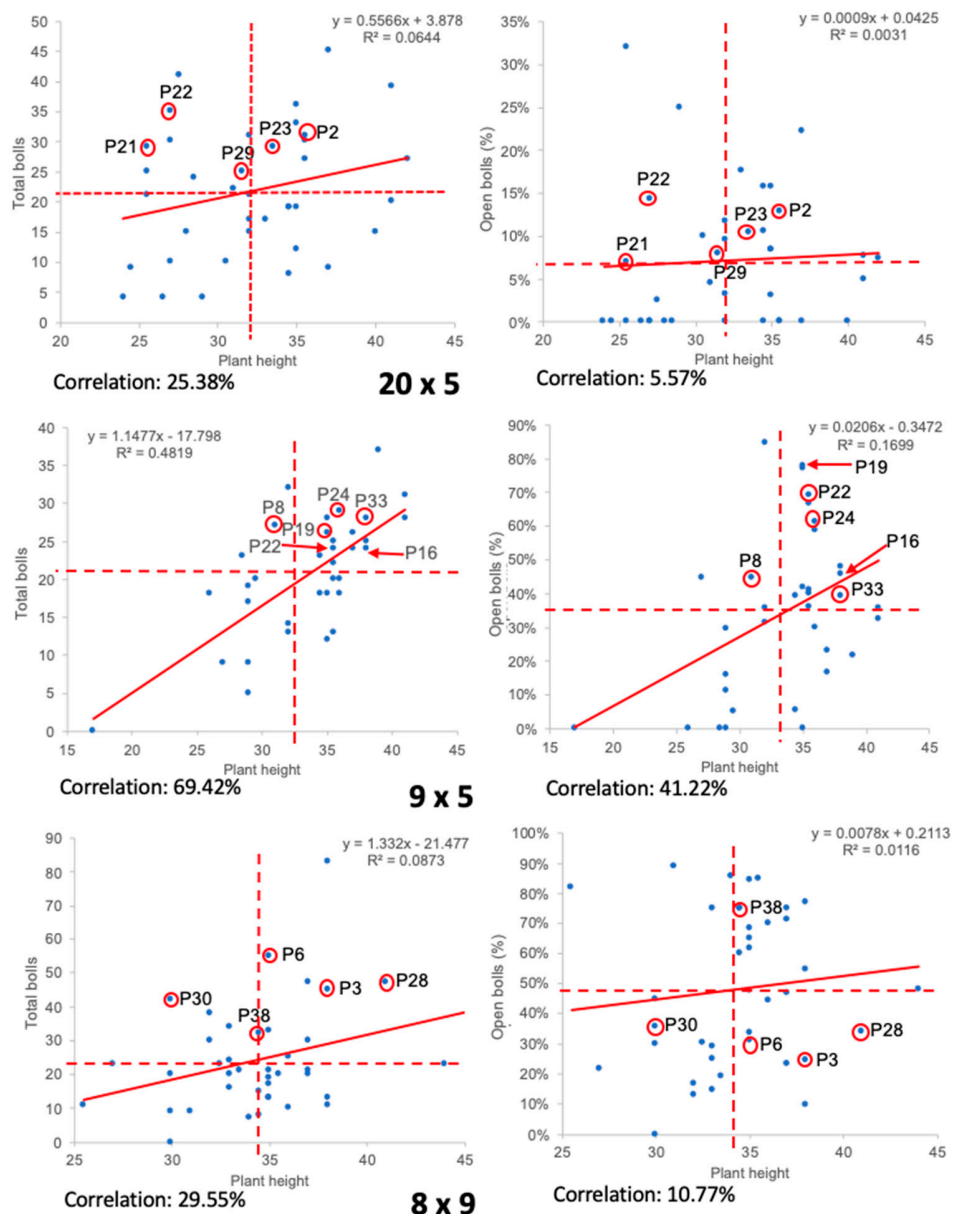

(A)

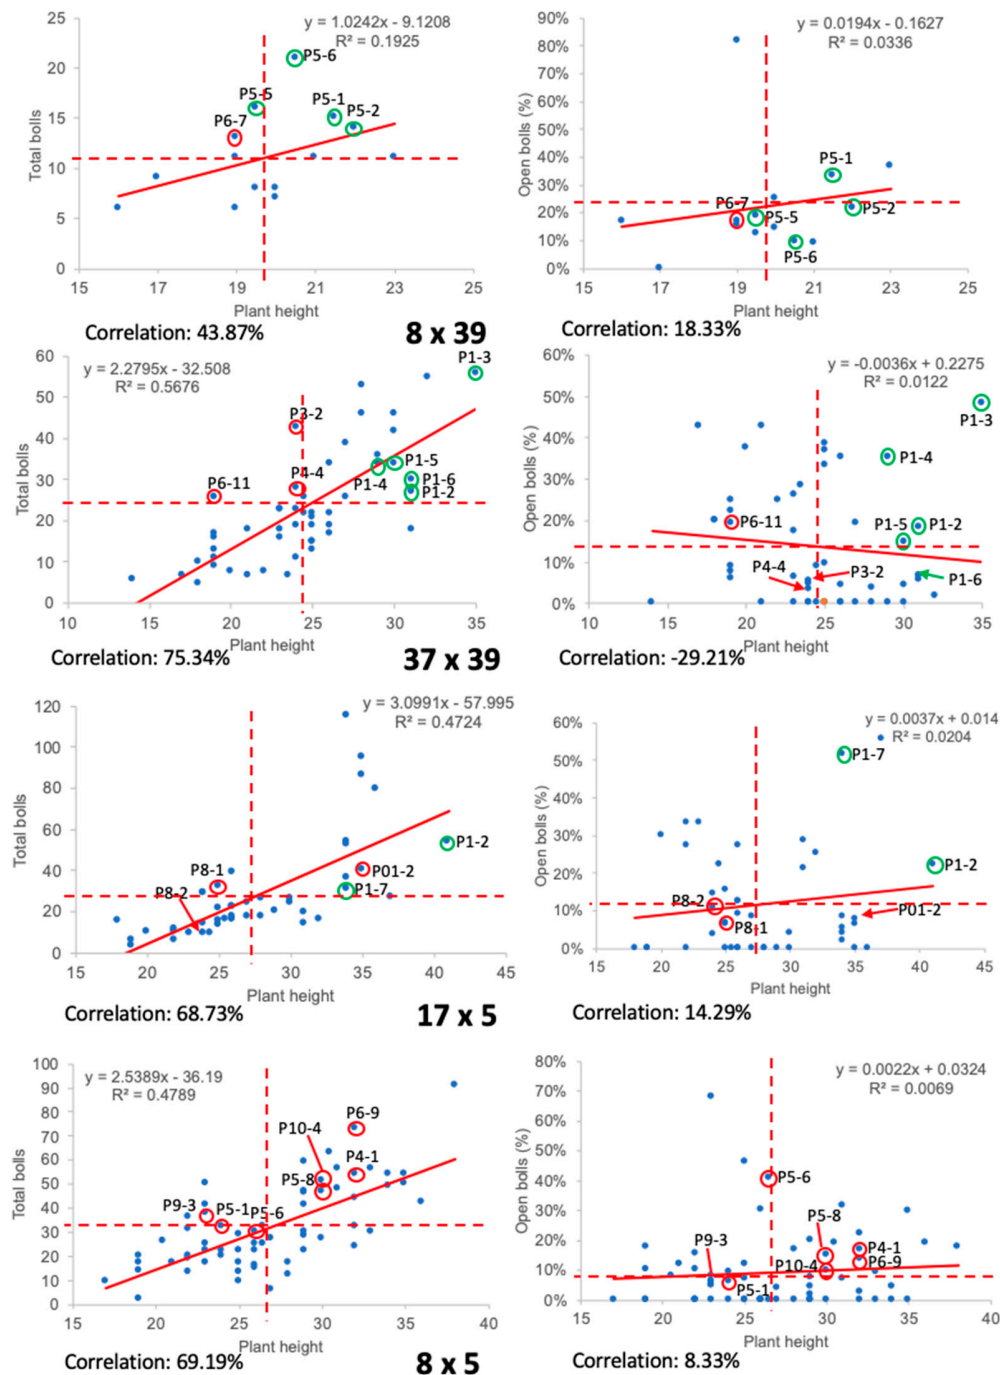

(B)

**Figure S2.** The regression plots made using the phenotypic data collected on plant height and total boll number (left) and plant height and percent open bolls (right) in seven F<sub>2</sub> populations, A and in four F<sub>3</sub> populations, B. Genotypes selected for propagation in Costa Rica are circled. The Pearson correlation values are provided below each plot, and the population means for plant height, total boll number, and percent open bolls are shown by dotted lines in each plot. The F<sub>2/3</sub> population is also labeled below the plot in bold letter. For genotype names, see Supplementary Table S1, S8, and S9.

**Table S1.** List of 44 Upland cotton minicore collection genotypes used in the present study.

| <b>Genotype ID</b> | <b>Genotype name</b>    |
|--------------------|-------------------------|
| 1                  | ACALA 111 ROGERS        |
| 2                  | ACALA 5                 |
| 3                  | ALLEN 33                |
| 4                  | ARKANSAS 10             |
| 5                  | ARKOT 8102              |
| 6                  | BJAGL NECT              |
| 7                  | CA23                    |
| 8                  | CABD3CABCH-1-89         |
| 9                  | CAHUGLBBCS-1-88         |
| 10                 | COKER 201               |
| 11                 | CS-8610                 |
| 12                 | EARLISTAPLE 7           |
| 13                 | EMPIRE                  |
| 14                 | EXPRESS 121             |
| 15                 | FJA                     |
| 16                 | GREGG 35                |
| 17                 | GSA 74                  |
| 18                 | H1330                   |
| 19                 | HALF AND HALF           |
| 20                 | HOPI MOENCOPI           |
| 21                 | LZ.850082FN             |
| 22                 | LBBCDBOAKH-1-90         |
| 23                 | LOCKETT 88              |
| 24                 | M.U.8B UA 7-44          |
| 25                 | NC 88-95                |
| 26                 | NEW BOYKIN              |
| 27                 | PAYMASTER 101           |
| 28                 | PAYMASTER HS26          |
| 29                 | PD 0113                 |
| 30                 | PD 781                  |
| 31                 | PD 785                  |
| 32                 | PD 93009                |
| 33                 | PD 93030                |
| 34                 | SEALAND #2              |
| 35                 | SEALAND #7 WHITE FLOWER |
| 36                 | SOUTHLAND M1            |
| 37                 | SPNXCHGLBH-1-94         |
| 38                 | STATION MILLER          |
| 39                 | TAMCOT SP-23            |

|    |                      |
|----|----------------------|
| 40 | TASHKENT 1           |
| 41 | TIDEWATER 29         |
| 42 | TOOLE                |
| 43 | WANNAMAKER CLEVELAND |
| 46 | DELTAPINE 14         |

**Table S2.** List of allele-specific primers developed for the expression trait-associated SNPs for use in PCR-based assays and 18srRNA used as positive control. The two SNP alleles are shown in red, a non-template-specific nucleotide change is shown in blue color (lowercase). Common reverse or forward primers are shown in purple color.

| Associated SNP   | Alleles | Primer name  | Primer sequence (5'-3')                                    |
|------------------|---------|--------------|------------------------------------------------------------|
| i02927Gh         | A/G     | i02927Gh_A_F | GTTTCTAGGCTAATACAACCTTA <sup>c</sup> AA <sup>A</sup>       |
|                  |         | i02927Gh_G_F | GTTTCTAGGCTAATACAACCTTA <sup>c</sup> AG <sup>G</sup>       |
|                  |         | i02927Gh_R   | AGAGTGGTTCATTGTTGTTGTGA                                    |
| i43992Gh         | T/C     | i43992Gh_F   | ATGTCGTGCATGTCAAATGG                                       |
|                  |         | i43992Gh_C_R | TAACTTTAGTAAAATTTGAATTTTATACa <sup>A</sup> G <sup>G</sup>  |
|                  |         | i43992Gh_T_R | TAACTTTAGTAAAATTTGAATTTTATACa <sup>A</sup> AA <sup>A</sup> |
| *i13158Gh        | A/G     | i13158Gh_A_F | CGGATTATTACAAGAAAGTTTGc <sup>A</sup> A <sup>A</sup>        |
|                  |         | i13158Gh_G_F | CGGATTATTACAAGAAAGTTTGc <sup>C</sup> G <sup>G</sup>        |
|                  |         | i13158Gh_R   | CGGCGTGTGTTTTATCAGAGT                                      |
| *i09222Gh        | T/C     | i09222Gh_C_F | GTCAATCATCTAACATCCTACTg <sup>A</sup> C <sup>C</sup>        |
|                  |         | i09222Gh_T_F | GTCAATCATCTAACATCCTACTg <sup>A</sup> T <sup>T</sup>        |
|                  |         | i09222Gh_R   | TGTCATTGTCGTCGATCCCA                                       |
| *i00443Gh        | C/T     | i00443Gh_T_F | CATTGTGGTGTCTTCTGTc <sup>A</sup> T <sup>T</sup>            |
|                  |         | i00443Gh_C_F | CATTGTGGTGTCTTCTGTc <sup>A</sup> C <sup>C</sup>            |
|                  |         | i00443Gh_R   | TATCCTCCACATCCTCTGCC                                       |
| i08185Gh         | C/T     | i08185Gh_F   | AGGAAGAATGGAATGGGCAGA                                      |
|                  |         | i08185Gh_C_R | AGGAATGGGAGGTGAGCg <sup>A</sup> G <sup>G</sup>             |
|                  |         | i08185Gh_T_R | AGGAATGGGAGGTGAGCg <sup>A</sup> AA <sup>A</sup>            |
| i13848Gh         | C/T     | i13848Gh_C_F | GGTCCGGAGCTGGCa <sup>A</sup> C <sup>C</sup>                |
|                  |         | i13848Gh_T_F | GGTCCGGAGCTGGCa <sup>A</sup> T <sup>T</sup>                |
|                  |         | i13848Gh_R   | GCCCTAAGTCAAAGCA                                           |
| *i13851Gh        | G/A     | i13851Gh_F   | TGACTCACTGTACATGGGCT                                       |
|                  |         | i13851Gh_A_R | GTTGCCAAAGATTCTTCAATACTGAt <sup>T</sup> T <sup>T</sup>     |
|                  |         | i13851Gh_G_R | GTTGCCAAAGATTCTTCAATACTGAt <sup>T</sup> C <sup>C</sup>     |
| Positive control |         | 18srRNA-F    | TCTGCCCTATCAACTTTTCGATGGTA                                 |
|                  |         | 18srRNA-R    | AATTGCGCGCCTGCTGCCTTCCTT                                   |

Note: Markers marked with an asterisk (\*) are used for the validation on 91 lines of F<sub>2</sub> population (17x39) in this study.

**Table S3.** List of genetic crosses made among five selected Upland cotton genotypes (ARKOT-8102, CABD3CABCH-1-89, GSA-74, SPNXCHGLBH-1-94, and TAMCOT SP-23), during 2018 and three selected Upland cotton genotypes (CAHUGLBBCS-1-88, COKER-201, and HOPI MOENCOPI) during 2019.

| Field ID | Female          | Male            | Crosses made |
|----------|-----------------|-----------------|--------------|
| 5        | ARKOT-8102      | CABD3CABCH-1-89 | 18           |
| 5        | ARKOT-8102      | GSA74           | 21           |
| 5        | ARKOT-8102      | SPNXCHGLBH-1-94 | 21           |
| 5        | ARKOT-8102      | TAMCOT SP-23    | 21           |
| 8        | CABD3CABCH-1-89 | ARKOT-8102      | 21           |
| 8        | CABD3CABCH-1-89 | GSA74           | 21           |
| 8        | CABD3CABCH-1-89 | SPNXCHGLBH-1-94 | 20           |
| 8        | CABD3CABCH-1-89 | TAMCOT SP-23    | 22           |
| 8        | CABD3CABCH-1-89 | CAHUGLBBCS-1-88 | 18           |
| 8        | CABD3CABCH-1-89 | COKER-201       | 18           |
| 8        | CABD3CABCH-1-89 | HOPI MOENCOPI   | 18           |
| 9        | CAHUGLBBCS-1-88 | ARKOT-8102      | 19           |
| 9        | CAHUGLBBCS-1-88 | COKER-201       | 18           |
| 9        | CAHUGLBBCS-1-88 | SPNXCHGLBH-1-94 | 17           |
| 17       | GSA74           | ARKOT-8102      | 20           |
| 17       | GSA74           | CABD3CABCH-1-89 | 20           |
| 17       | GSA74           | SPNXCHGLBH-1-94 | 22           |
| 17       | GSA74           | TAMCOT SP-23    | 19           |
| 20       | HOPI MOENCOPI   | ARKOT-8102      | 18           |
| 20       | HOPI MOENCOPI   | CAHUGLBBCS-1-88 | 18           |
| 20       | HOPI MOENCOPI   | COKER-201       | 18           |
| 20       | HOPI MOENCOPI   | SPNXCHGLBH-1-94 | 19           |
| 37       | SPNXCHGLBH-1-94 | ARKOT8102       | 18           |
| 37       | SPNXCHGLBH-1-94 | CABD3CABCH-1-89 | 20           |
| 37       | SPNXCHGLBH-1-94 | GSA74           | 19           |
| 37       | SPNXCHGLBH-1-94 | TAMCOT SP-23    | 20           |
| 39       | TAMCOT SP-23    | ARKOT-8102      | 20           |
| 39       | TAMCOT SP-23    | CABD3CABCH-1-89 | 22           |
| 39       | TAMCOT SP-23    | GSA74           | 21           |
| 39       | TAMCOT SP-23    | SPNXCHGLBH-1-94 | 20           |
| Total    |                 |                 | 587          |



**Table S4.** List of the F<sub>2</sub> populations (received from Costa Rica) sown at the Pee Dee REC.

| <b>Cross ID</b> | <b>Cross Combination</b>       | <b>Seeds Sown</b> | <b>Seeds Germinated</b> |
|-----------------|--------------------------------|-------------------|-------------------------|
| 8x5             | CABD3CABCH-1-89 × ARKOT-8102   | 230               | 102                     |
| 8x39            | CABD3CABCH-1-89 × TAMCOT SP-23 | 235               | 107                     |
| 37x39           | SPNXCHGLBH-1-94 × TAMCOT SP-23 | 220               | 103                     |
| 17x5            | GSA 74 × ARKOT-8102            | 243               | 106                     |
| 17x39           | GSA 74 × TAMCOT SP-23          | 246               | 93                      |

**Table S5. List of the F<sub>1</sub> genotypes sown at the Pee Dee REC.**

| <b>Cross ID</b> | <b>Cross Combination</b>          | <b>Seeds Sown</b> | <b>Seeds Germinated</b> |
|-----------------|-----------------------------------|-------------------|-------------------------|
| 5x8             | ARKOT 8102 × CABD3CABCH-1-89      | 122               | 95                      |
| 5x17            | ARKOT 8102 × GSA 74               | 98                | 69                      |
| 5x37            | ARKOT 8102 × SPNXCHGLBH-1-94      | 104               | 76                      |
| 5x39            | ARKOT 8102 × TAMCOT SP-23         | 50                | 23                      |
| 8x17            | CABD3CABCH-1-89 × GSA 74          | 50                | 30                      |
| 8x37            | CABD3CABCH-1-89 × SPNXCHGLBH-1-94 | 104               | 72                      |
| 17x8            | GSA 74 × CABD3CABCH-1-89          | 122               | 73                      |
| 17x37           | GSA 74 × SPNXCHGLBH-1-94          | 50                | 0                       |
| 37x5            | SPNXCHGLBH-1-94 × ARKOT 8102      | 86                | 37                      |
| 37x8            | SPNXCHGLBH-1-94 × CABD3CABCH-1-89 | 128               | 79                      |
| 37x17           | SPNXCHGLBH-1-94 × GSA 74          | 50                | 41                      |
| 39x5            | TAMCOT SP-23 × ARKOT 8102         | 50                | 42                      |
| 39x8            | TAMCOT SP-23 × CABD3CABCH-1-89    | 50                | 39                      |
| 39x17           | TAMCOT SP-23 × GSA 74             | 50                | 27                      |
| 39x37           | TAMCOT SP-23 × SPNXCHGLBH-1-94    | 50                | 23                      |

**Table S6.** List of F<sub>1</sub> lines sent for generation advancement at Costa Rica in the winter nursery 2019-2020.

| <b>Plant ID</b> | <b>Tab#</b> | <b>Genotype Combinations (genetic crosses)</b> |
|-----------------|-------------|------------------------------------------------|
| SR19-61 (0-4)   | 484         | CABD3CABCH-1-89 × CAHUGLBBCS-1-88              |
| SR19-62 (0-4)   | 460         | CAHUGLBBCS-1-88 × SPNXCHGLBH-1-94              |
| SR19-63 (0-4)   | 1618        | HOPI MOENCOPI × SPNXCHGLBH-1-94                |
| SR19-64 (0-4)   | 1064        | CAHUGLBBCS-1-88 × ARKOT-8102                   |
| SR19-65 (0-4)   | 1865        | HOPI MOENCOPI × CAHUGLBBCS-1-88                |
| SR19-66 (0-4)   | 652         | CAHUGLBBCS-1-88 × COKER-201                    |
| SR19-67 (0-4)   | 1301        | CABD3CABCH-1-89 × COKER-201                    |
| SR19-68 (0-4)   | 1734        | HOPI MOENCOPI × COKER-201                      |
| SR19-69 (0-4)   | 118         | CABD3CABCH-1-89 × HOPI MOENCOPI                |
| SR19-70 (0-4)   | 422         | HOPI MOENCOPI × ARKOT-8102                     |

**Table S7.** The allele-specific genotyping of the F<sub>2</sub> population (17x39) with i09222Gh, i00443Gh, i13158Gh, and i13851Gh molecular markers.

| Sample ID | 18srRNA | i09222Gh | i00443Gh | i13158Gh | i13851Gh |
|-----------|---------|----------|----------|----------|----------|
| 1         | +       | CT       | CC       | AA       | AA       |
| 2         | +       | *        | *        | *        | AA       |
| 3         | +       | TT       | CC       | *        | *        |
| 4         | +       | CT       | *        | *        | *        |
| 5         | +       | *        | *        | *        | *        |
| 6         | +       | TT       | *        | *        | *        |
| 7         | +       | *        | *        | *        | *        |
| 8         | +       | *        | *        | *        | *        |
| 9         | +       | *        | *        | *        | *        |
| 10        | +       | CT       | TT       | AG       | AG       |
| 11        | +       | CT       | *        | *        | AG       |
| 12        | +       | *        | *        | *        | *        |
| 13        | +       | *        | *        | *        | *        |
| 14        | +       | *        | *        | *        | *        |
| 15        | +       | TT       | CC       | AG       | *        |
| 16        | +       | CT       | TC       | AG       | *        |
| 17        | +       | CC       | *        | *        | *        |
| 18        | +       | TT       | *        | *        | *        |
| 19        | +       | CT       | CC       | AG       | AG       |
| 20        | +       | CC       | CC       | GG       | *        |
| 21        | +       | CC       | *        | *        | *        |
| 22        | +       | TT       | *        | *        | *        |
| 23        | +       | TT       | *        | AG       | *        |
| 24        | +       | *        | *        | AG       | *        |
| 25        | +       | *        | *        | *        | *        |
| 26        | +       | *        | *        | *        | *        |
| 27        | +       | CC       | TC       | AG       | GG       |
| 28        | +       | TT       | TC       | AG       | GG       |
| 29        | +       | TT       | *        | *        | GG       |
| 30        | +       | *        | *        | *        | *        |
| 31        | +       | *        | *        | *        | *        |
| 32        | +       | CT       | CC       | AG       | *        |
| 33        | +       | *        | *        | *        | GG       |
| 34        | +       | CT       | CC       | AG       | AG       |

|    |   |    |    |    |    |
|----|---|----|----|----|----|
| 35 | + | CT | CC | *  | AG |
| 36 | + | CT | *  | AA | AG |
| 37 | + | CC | *  | AA | AA |
| 38 | + | *  | *  | *  | AG |
| 39 | + | TT | *  | AA | AA |
| 40 | + | *  | *  | AA | *  |
| 41 | + | *  | *  | AA | GG |
| 42 | + | CC | *  | *  | *  |
| 43 | + | *  | *  | *  | *  |
| 44 | + | *  | CC | AG | *  |
| 45 | + | *  | TT | *  | *  |
| 46 | + | *  | TC | AG | GG |
| 47 | + | *  | TT | AA | GG |
| 48 | + | *  | *  | *  | AG |
| 49 | + | TT | TC | AG | *  |
| 50 | + | *  | *  | *  | *  |
| 51 | + | *  | *  | *  | *  |
| 52 | + | *  | *  | *  | *  |
| 53 | + | *  | *  | *  | *  |
| 54 | + | *  | *  | *  | *  |
| 55 | + | *  | *  | *  | *  |
| 56 | + | *  | *  | *  | *  |
| 57 | + | *  | *  | *  | *  |
| 58 | + | *  | *  | *  | *  |
| 59 | + | CC | *  | AA | AA |
| 60 | + | CC | *  | *  | *  |
| 61 | + | CT | TC | AA | AG |
| 62 | + | CC | *  | *  | *  |
| 63 | + | CT | CC | AA | GG |
| 64 | + | *  | *  | *  | *  |
| 65 | + | *  | *  | *  | *  |
| 66 | + | *  | *  | *  | *  |
| 67 | + | *  | TC | AG | AG |
| 68 | + | *  | *  | *  | *  |
| 69 | + | *  | *  | *  | *  |
| 70 | + | *  | *  | *  | *  |
| 71 | + | *  | *  | *  | *  |
| 72 | + | CT | TT | GG | AA |
| 73 | + | CC | CC | AG | AA |

|    |   |    |    |    |    |
|----|---|----|----|----|----|
| 74 | + | CT | TC | AG | AA |
| 75 | + | *  | *  | AA | GG |
| 76 | + | CT | CC | AG | GG |
| 77 | + | *  | *  | *  | *  |
| 78 | + | *  | *  | *  | *  |
| 79 | + | CT | TC | AG | GG |
| 80 | + | *  | *  | *  | *  |
| 81 | + | *  | *  | *  | AG |
| 82 | + | *  | CC | *  | *  |
| 83 | + | *  | *  | *  | *  |
| 84 | + | *  | *  | *  | *  |
| 85 | + | CT | TC | AG | AG |
| 86 | + | CT | TC | AG | AG |
| 87 | + | *  | *  | *  | *  |
| 88 | + | TT | *  | *  | AG |
| 89 | + | CT | *  | GG | AG |
| 90 | + | CC | *  | GG | AG |
| 91 | + | *  | *  | *  | *  |

Note 1: \* the plants did not produce any data with these molecular markers.

Note 2: + shows positive results with 18SrRNA.

**Table S8.** List of F<sub>2</sub> plants selected for propagation in Costa Rica in 2020.

| <b>Plant Id</b>                                   | <b>Selections for F<sub>3</sub></b> |
|---------------------------------------------------|-------------------------------------|
| <b>CABD3CABCH-1-89 (8) x CAHUGLBBCS-1-88 (9)</b>  |                                     |
| P3                                                | SNR-8x9-301                         |
| P6                                                | SNR-8x9-302                         |
| P28                                               | SNR-8x9-303                         |
| P30                                               | SNR-8x9-304                         |
| P38                                               | SNR-8x9-305                         |
| <b>CAHUGLBBCS-1-88 (9) x ARKOT 8102 (5)</b>       |                                     |
| P8                                                | SNR-9x5-401                         |
| P16                                               | SNR-9x5-402                         |
| P19                                               | SNR-9x5-403                         |
| P22                                               | SNR-9x5-404                         |
| P24                                               | SNR-9x5-405                         |
| P33                                               | SNR-9x5-407                         |
| <b>HOPI MOENCOPI (20) x ARKOT 8102 (5)</b>        |                                     |
| P2                                                | SNR-20x5-501                        |
| P21                                               | SNR-20x5-502                        |
| P22                                               | SNR-20x5-503                        |
| P23                                               | SNR-20x5-504                        |
| P29                                               | SNR-20x5-505                        |
| <b>TAMCOT SP-23 (39) x ARKOT 8102 (5)</b>         |                                     |
| P5                                                | SNR-39x5-601                        |
| P14                                               | SNR-39x5-602                        |
| P17                                               | SNR-39x5-603                        |
| P19                                               | SNR-39x5-604                        |
| <b>SPNXCHGLBH-1-94 (37) x CABD3CABCH-1-89 (8)</b> |                                     |
| P7                                                | SNR-37x8-201                        |
| P19                                               | SNR-37x8-202                        |
| <b>CABD3CABCH-1-89 (8) x SPNXCHGLBH-1-94 (37)</b> |                                     |
| P1                                                | SNR-8x37-801                        |
| P2                                                | SNR-8x37-802                        |
| <b>HOPI MOENCOPI (20) x SPNXCHGLBH-1-94 (37)</b>  |                                     |
| P9                                                | SNR-20x37-901                       |
| P24                                               | SNR-20x37-902                       |
| P33                                               | SNR-20x37-903                       |
| P36                                               | SNR-20x37-904                       |

**Table S9.** List of F<sub>3</sub> plants selected for propagation in Costa Rica in 2020.

| Plant Id                                        | Selections for F <sub>4</sub> | Remark |
|-------------------------------------------------|-------------------------------|--------|
| <b>SPNXCHGLBH-1-94 (37) x TAMCOT SP-23 (39)</b> |                               |        |
| P1-2                                            | SNR-37/39-5001-2              | LE     |
| P1-3                                            | SNR-37/39-5001-3              | LE     |
| P1-4                                            | SNR-37/39-5001-4              | LE     |
| P1-5                                            | SNR-37/39-5001-5              | LE     |
| P1-6                                            | SNR-37/39-5001-6              | LE     |
| P6-11                                           | SNR-37/39-706-11              | HE     |
| P3-2                                            | SNR-37/39-703-2               | HE     |
| P4-4                                            | SNR-37/39-704-4               | HE     |
| <b>GSA 74 (17) x ARKOT 8102 (5)</b>             |                               |        |
| P1-2                                            | SNR-17/5-3001-2               | LE     |
| P1-7                                            | SNR-17/5-3001-7               | LE     |
| P8-1                                            | SNR-17/5-108-1                | HE     |
| P8-2                                            | SNR-17/5-108-2                | HE     |
| P01-2                                           | SNR-17/5-101-2                | HE     |
| <b>CABD3CABCH-1-89 (8) x TAMCOT SP-23 (39)</b>  |                               |        |
| P5-1                                            | SNR-8/39-2005-1               | LE     |
| P5-2                                            | SNR-8/39-2005-2               | LE     |
| P5-5                                            | SNR-8/39-2005-5               | LE     |
| P5-6                                            | SNR-8/39-2005-6               | LE     |
| P6-7                                            | SNR-8/39-006-7                | HE     |
| <b>CABD3CABCH-1-89 (8) x ARKOT 8102 (5)</b>     |                               |        |
| P4-1                                            | SNR-8/5-4-1                   | HE     |
| P5-1                                            | SNR-8/5-5-1                   | HE     |
| P5-6                                            | SNR-8/5-5-6                   | HE     |
| P5-8                                            | SNR-8/5-5-8                   | HE     |
| P6-9                                            | SNR-8/5-6-9                   | HE     |
| P9-3                                            | SNR-8/5-9-3                   | HE     |
| P10-4                                           | SNR-8/5-10-4                  | HE     |

Note: Plants from two extremes of the population distribution of the phenotypic traits (flower number, flowering time, timing of first boll opening, and plant height) recorded in 2019. HE = plants showing higher phenotypic expression and LE = lower phenotypic expression for the studied phenotypic traits.



**Table S10.** List of the populations sown at PDREC research fields in 2021.

| <b>Lines</b>                    | <b>Seeds Germinated</b> | <b>Seeds Sown</b> | <b>Germination Percentage</b> |
|---------------------------------|-------------------------|-------------------|-------------------------------|
| <b>F<sub>4</sub>-Costa Rica</b> |                         |                   |                               |
| 17x5-101-2                      | 49                      | 100               | 49                            |
| 8x5-10-4                        | 41                      | 100               | 41                            |
| <b>F<sub>3</sub>-Costa Rica</b> |                         |                   |                               |
| 9x5-406                         | 61                      | 100               | 61                            |
| 9x5-402                         | 0                       | 100               | 0                             |
| 20x37-904                       | 52                      | 100               | 52                            |
| 20x37-901                       | 22                      | 100               | 22                            |
| 8x9-304                         | 15                      | 100               | 15                            |
| 39x5-604                        | 50                      | 100               | 50                            |
| 20x5-504                        | 49                      | 100               | 49                            |
| <b>F<sub>3</sub>-PDREC-2020</b> |                         |                   |                               |
| 37x39-706-11                    | 0                       | 100               | 0                             |
| 37x39-704-4                     | 0                       | 100               | 0                             |
| 37x39-703-2                     | 12                      | 100               | 12                            |
| 37x39-5001-2                    | 16                      | 100               | 16                            |
| 37x39-5001-3                    | 11                      | 100               | 11                            |
| 37x39-5001-4                    | 12                      | 100               | 12                            |
| 37x39-5001-5                    | 1                       | 100               | 1                             |
| 37x39-5001-6                    | 24                      | 100               | 24                            |
| 8x5-4-1                         | 30                      | 100               | 30                            |
| 8x5-5-1                         | 0                       | 100               | 0                             |
| 8x5-5-6                         | 1                       | 100               | 1                             |
| 8x5-5-8                         | 50                      | 100               | 50                            |
| 8x5-6-9                         | 19                      | 100               | 19                            |
| 8x5-9-3                         | 29                      | 100               | 29                            |
| 8x39-006-7                      | 34                      | 100               | 34                            |
| 8x39-2005-1                     | 26                      | 100               | 26                            |
| 8x39-2005-2                     | 31                      | 100               | 31                            |
| 8x39-2005-5                     | 20                      | 100               | 20                            |
| 8x39-2005-6                     | 0                       | 100               | 0                             |
| 17x5-3001-2                     | 6                       | 100               | 6                             |
| 17x5-3001-7                     | 18                      | 100               | 18                            |
| 17x5-108-1                      | 7                       | 100               | 7                             |
| 17x5-108-2                      | 6                       | 100               | 6                             |
| <b>F<sub>2</sub>-PDREC-2020</b> |                         |                   |                               |
| 20x5-501                        | 20                      | 100               | 20                            |
| 20x5-502                        | 0                       | 100               | 0                             |
| 20x5-503                        | 0                       | 100               | 0                             |
| 20x5-505                        | 14                      | 100               | 14                            |

|           |    |     |    |
|-----------|----|-----|----|
| 20x37-902 | 42 | 100 | 42 |
| 8x37-801  | 0  | 100 | 0  |
| 8x37-802  | 9  | 100 | 9  |
| 8x9-301   | 28 | 100 | 28 |
| 8x9-302   | 0  | 100 | 0  |
| 8x9-303   | 0  | 100 | 0  |
| 8x9-305   | 9  | 100 | 9  |
| 9x5-401   | 49 | 100 | 49 |
| 9x5-403   | 54 | 100 | 54 |
| 9x5-405   | 23 | 100 | 23 |
| 39x5-601  | 35 | 100 | 35 |
| 39x5-602  | 26 | 100 | 26 |
| 39x5-603  | 18 | 100 | 18 |
| 20x37-903 | 0  | 100 | 0  |

**Table S11.** List of F<sub>4</sub> plants selected for propagation in Costa Rica.

| <b>Plant Id</b>                                  | <b>Selections for F<sub>4</sub></b> |
|--------------------------------------------------|-------------------------------------|
| <b>CAHUGLBBCS-1-88 (9) x ARKOT 8102 (5)</b>      |                                     |
| P1                                               | SNR-9x5-406-C1                      |
| P41                                              | SNR-9x5-406-C2                      |
| <b>HOPI MOENCOPI (20) x SPNXCHGLBH-1-94 (37)</b> |                                     |
| P46                                              | SNR-20x37-904-D1                    |
| P52                                              | SNR-20x37-904-D2                    |
| P53                                              | SNR-20x37-904-D3                    |
| <b>HOPI MOENCOPI (20) x SPNXCHGLBH-1-94 (37)</b> |                                     |
| P8                                               | SNR-20x37-901-K1                    |
| P14                                              | SNR-20x37-901-K2                    |
| <b>CABD3CABCH-1-89 (8) x CAHUGLBBCS-1-88 (9)</b> |                                     |
| P15                                              | SNR-8x9-304-E1                      |
| P16                                              | SNR-8x9-304-E2                      |
| P17                                              | SNR-8x9-304-E3                      |
| <b>TAMCOT SP-23 (39) x ARKOT 8102 (5)</b>        |                                     |
| P17                                              | SNR-39x5-604-H1                     |
| P30                                              | SNR-39x5-604-H2                     |
| <b>HOPI MOENCOPI (20) x ARKOT 8102 (5)</b>       |                                     |
| P23                                              | SNR-20x5-504-J1                     |
| P36                                              | SNR-20x5-504-J2                     |
| P42                                              | SNR-20x5-504-J3                     |
| P43                                              | SNR-20x5-504-J4                     |
| P46                                              | SNR-20x5-504-J5                     |

**Table S12.** List of F<sub>5</sub> plants selected for propagation in Costa Rica.

| <b>Plant Id</b>                             | <b>Selections for F<sub>5</sub></b> |
|---------------------------------------------|-------------------------------------|
| <b>GSA 74 (17) x ARKOT 8102 (5)</b>         |                                     |
| P21                                         | SNR-17x5-101-2-A1                   |
| P32                                         | SNR-17x5-101-2-A2                   |
| P34                                         | SNR-17x5-101-2-A3                   |
| P35                                         | SNR-17x5-101-2-A4                   |
| P33                                         | SNR-17x5-101-2-A5                   |
| <b>CABD3CABCH-1-89 (8) x ARKOT 8102 (5)</b> |                                     |
| P27                                         | SNR-8x5-10-4-B1                     |
| P31                                         | SNR-8x5-10-4-B2                     |
| P33                                         | SNR-8x5-10-4-B3                     |
| P39                                         | SNR-8x5-10-4-B4                     |
| P41                                         | SNR-8x5-10-4-B5                     |

**Table S13.** The list of selected genotypes sent for generation advancement (F<sub>9</sub>/F<sub>8</sub>) to Costa Rica in 2022.

| Genotype | Plant Number |    |     |   |   | Block Number |
|----------|--------------|----|-----|---|---|--------------|
| 20x37-K1 | 6            | 7* | 9   | 8 | 5 | 2            |
| 20x37-K2 | 6            | 3* | 10  | 5 | 8 | 2            |
| 20x37-D1 | 6            | 4  | 5*  | 9 | 7 | 1            |
| 20x5-J3  | 4            | 6* | 3   | 9 |   | 2            |
| 20x5-J2  | 7            | 5* | 10  | 2 |   | 3            |
| 39x5-H1  | 9            | 6* | 1   |   |   | 3            |
| 8x9-E3   | 8            | 3* | 4   |   |   | 1            |
| 8x9-E2   | 8            | 1  | 2*  | 4 |   | 3            |
| 9x5-C1   | 5            | 9* | 10  | 1 |   | 1            |
| 8x5-B1   | 9            | 6* | 5   | 8 |   | 2            |
| 8x5-B4   | 4            | 2  | 10* | 9 |   | 1            |
| 8x5-B3   | 10*          | 9  | 6   | 3 |   | 2            |
| 17x5-A5  | 7*           | 8  | 3   | 5 |   | 3            |
| 17x5-A2  | 4*           | 5  | 1   | 8 |   | 3            |
| 17x5-A1  | 5            | 4* | 6   | 9 |   | 2            |

\*Selected plants sent to Costa Rica for an increase.
